# Supplementary material for: Effect of temperature on anisotropic bending elasticity of dsRNA: an all-atom molecular dynamics simulation
Source: Royal Society of Chemistry journal article supplement (doi:10.1039/d4ra02354d), 2024-01-01
Supplement: d4ra02354d1.pdf [file d4ra02354d1.pdf]

**Supporting Information for**  
**“Effect of temperature on anisotropic bending elasticity of dsRNA:**  
**An all-atom molecular dynamics simulation”**

**Xianghong Wang<sup>1, a)</sup>, Tingting Huang<sup>1</sup>, Liyun Li<sup>2</sup>, Yanliang Xu<sup>1</sup>**

<sup>1</sup>School of Sino-German Engineering, Shanghai Technical Institute of Electronics and Information, Shanghai 201411, China

<sup>2</sup>Department of Physics, Wenzhou University, Wenzhou, Zhejiang 325035, China.

a) Authors to whom correspondence should be addressed.

Electronic addresses: wangxianghong@stiei.edu.cn (X.Wang)

**Fig. S1**

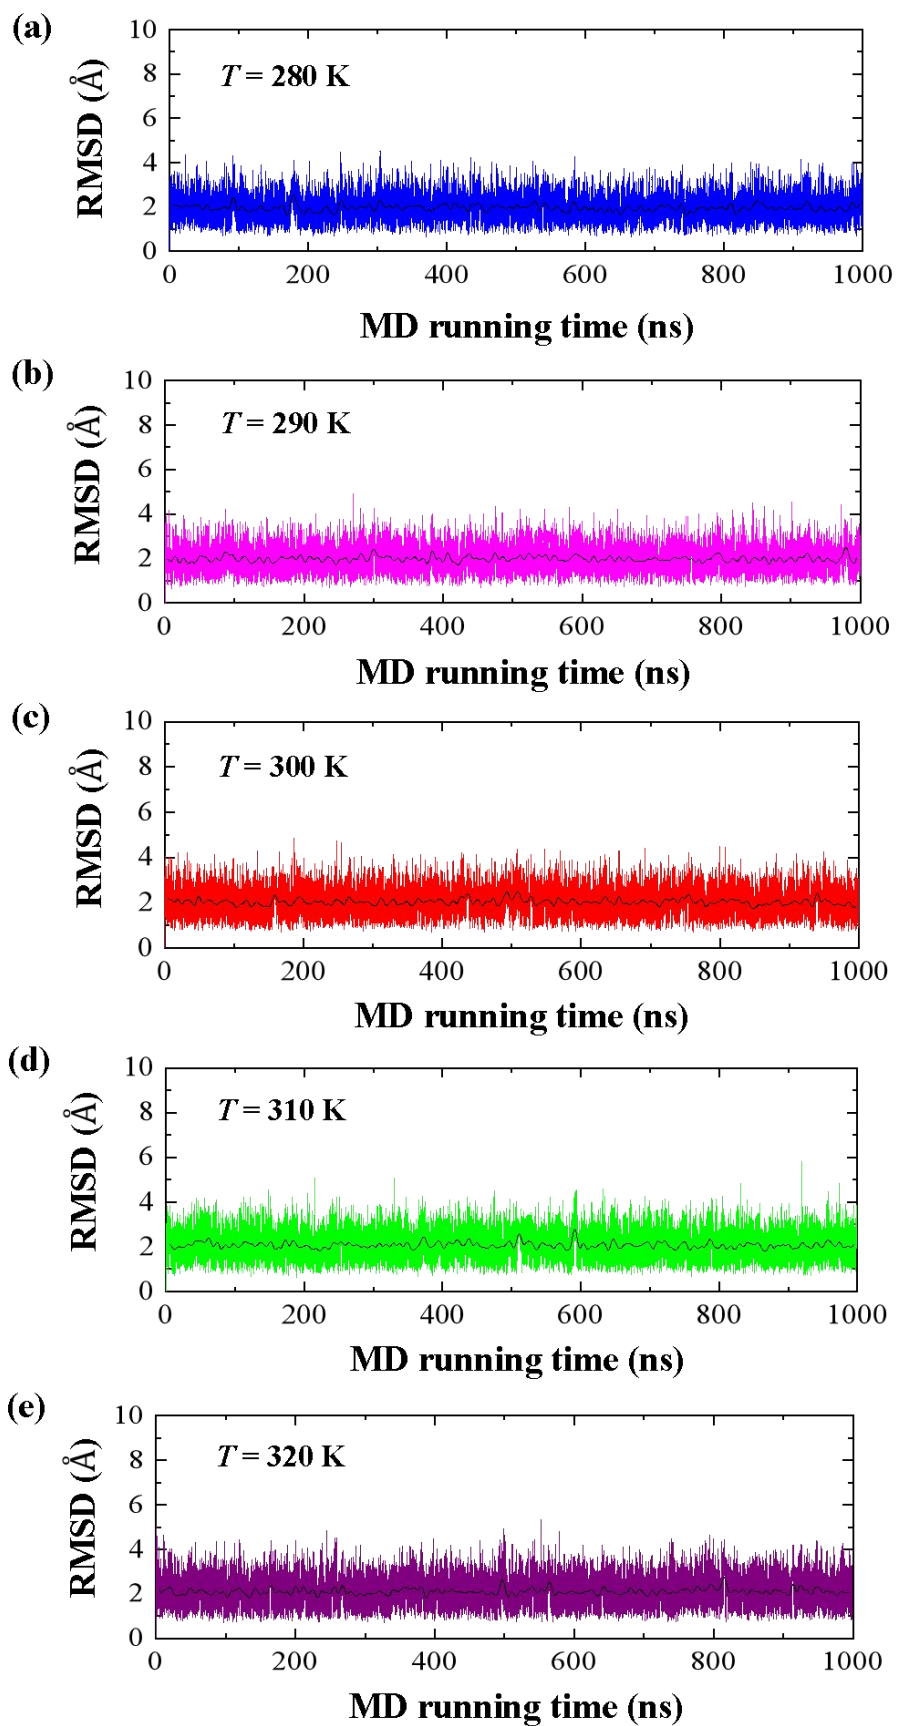

**Fig. S1**

(a) Root mean square deviation (RMSD) curves of the 10 bases fragment in the center of the dsRNA at  $T = 280$  K, where the black line indicates the average value of the relevant parameter every 2 ns.

(b) Root mean square deviation (RMSD) curves of the 10 bases fragment in the center of the dsRNA at  $T = 290$  K, where the black line indicates the average value of the relevant parameter every 2 ns.

(c) Root mean square deviation (RMSD) curves of the 10 bases fragment in the center of the dsRNA at  $T = 300$  K, where the black line indicates the average value of the relevant parameter every 2 ns.

(d) Root mean square deviation (RMSD) curves of the 10 bases fragment in the center of the dsRNA at  $T = 310$  K, where the black line indicates the average value of the relevant parameter every 2 ns.

(e) Root mean square deviation (RMSD) curves of the 10 bases fragment in the center of the dsRNA at  $T = 320$  K, where the black line indicates the average value of the relevant parameter every 2 ns.

**Fig. S2**

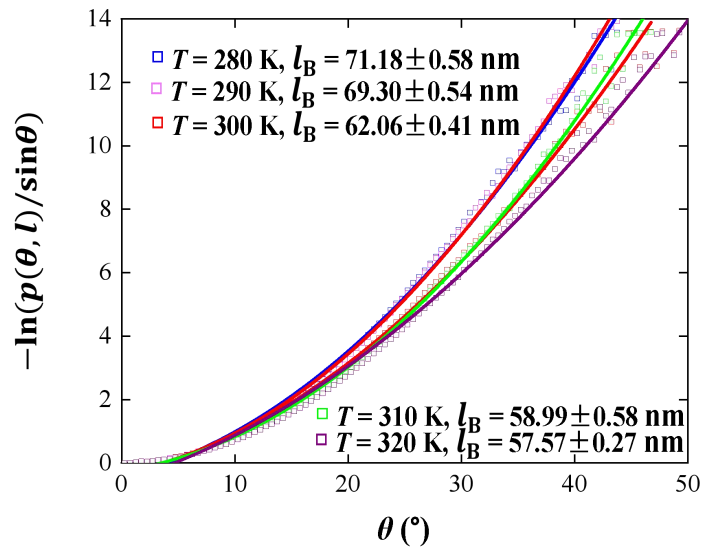

**Fig. S2**

The relationship between  $-\ln(p(\theta, l)/\sin\theta)$  and bending angle  $\theta$  at  $T = 280\text{K}, 290\text{K}, 300 \text{ K}, 310\text{K}, 320\text{K}$ . The bending angle  $\theta$  is formed by six consecutive base pairs on each of the 10 base segments at the center of the dsRNA.

**Fig. S3**

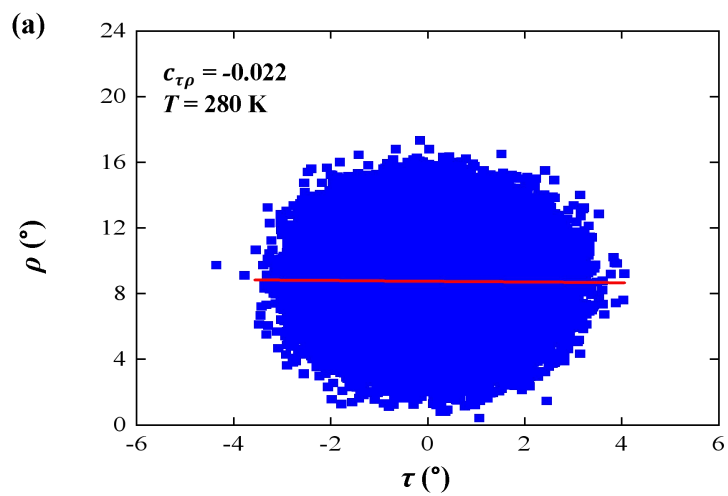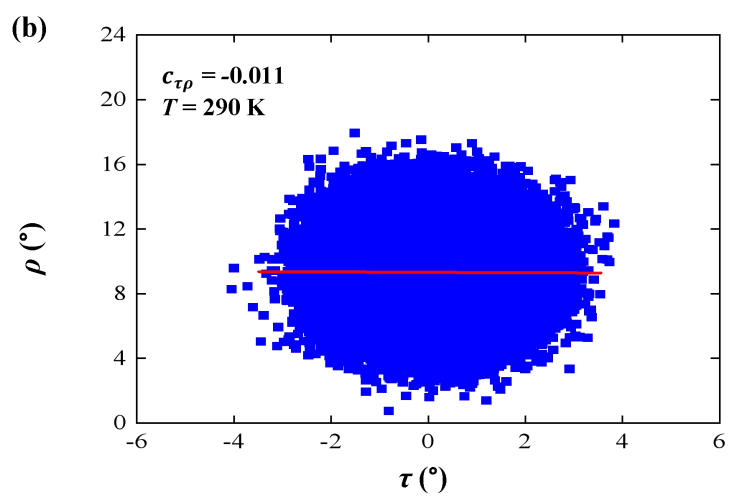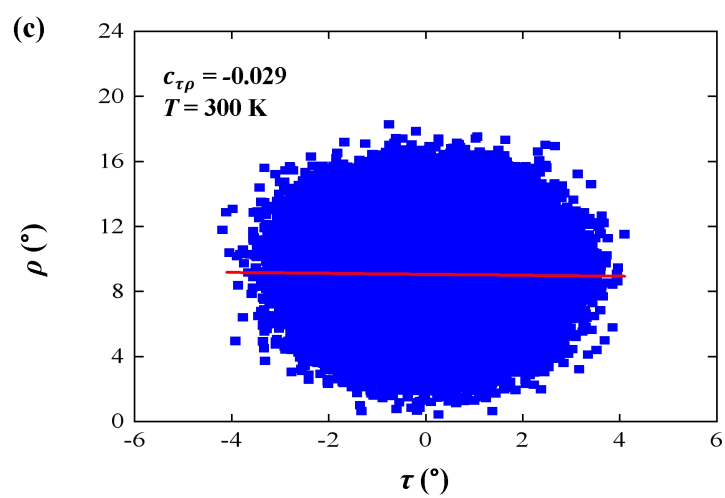

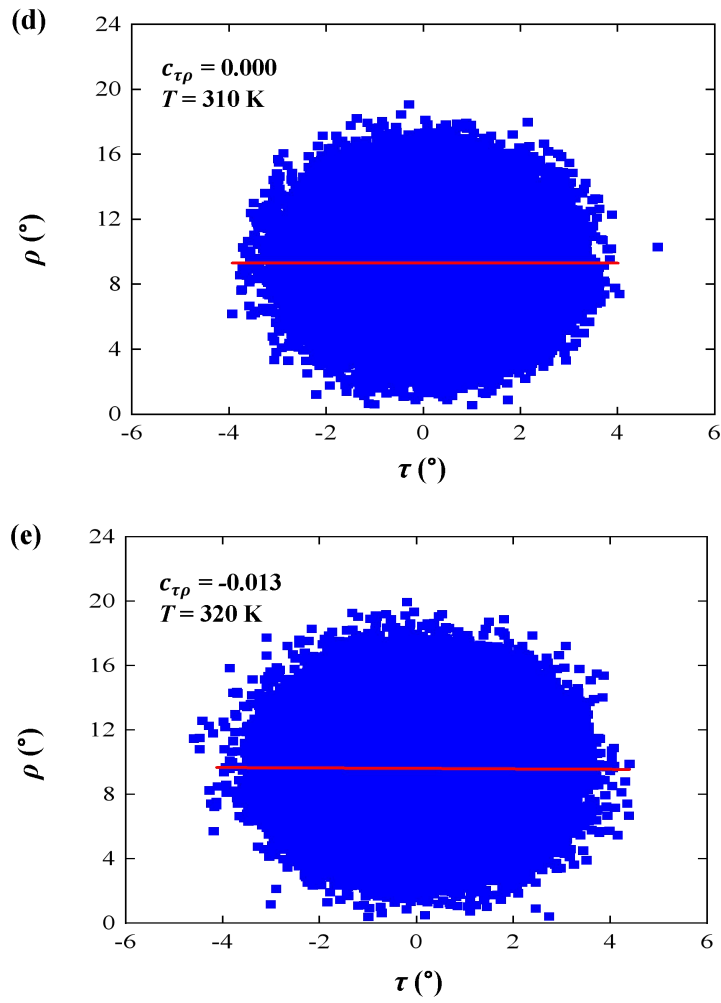

**Fig. S3**

- (a) An example of correlation between tilt ( $\tau$ ) and roll ( $\rho$ ). The data correlation coefficient is  $c_{\tau\rho} = -0.022$ .
- (b) An example of correlation between tilt ( $\tau$ ) and roll ( $\rho$ ). The data correlation coefficient is  $c_{\tau\rho} = -0.011$ .
- (c) An example of correlation between tilt ( $\tau$ ) and roll ( $\rho$ ). The data correlation coefficient is  $c_{\tau\rho} = -0.029$ .
- (d) An example of correlation between tilt ( $\tau$ ) and roll ( $\rho$ ). The data correlation coefficient is  $c_{\tau\rho} = 0.000$ .
- (e) An example of correlation between tilt ( $\tau$ ) and roll ( $\rho$ ). The data correlation coefficient is  $c_{\tau\rho} = -0.013$ .

**Fig. S4**

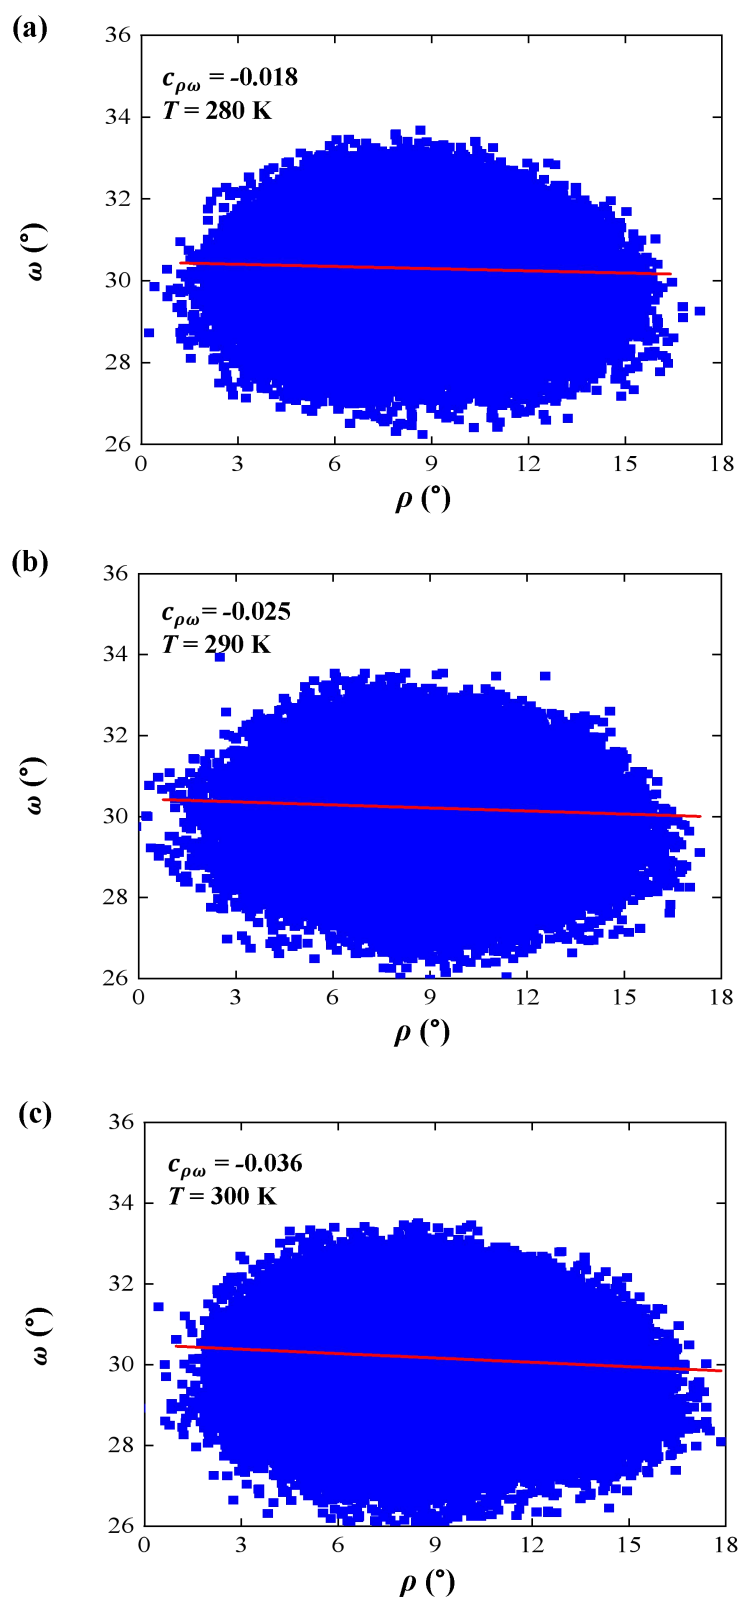

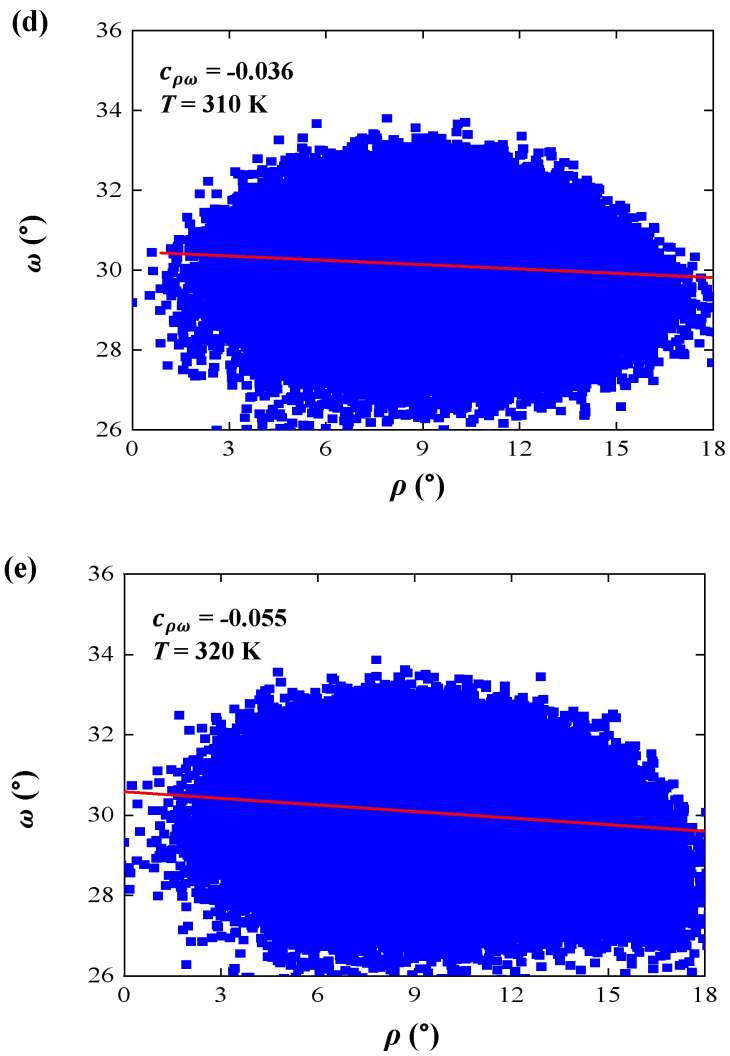

**Fig. S4**

- (a) An example of correlation between roll ( $\rho$ ) and twist ( $\omega$ ). The data correlation coefficient is  $c_{\rho\omega} = -0.018$ .
- (b) An example of correlation between roll ( $\rho$ ) and twist ( $\omega$ ). The data correlation coefficient is  $c_{\rho\omega} = -0.025$ .
- (c) An example of correlation between roll ( $\rho$ ) and twist ( $\omega$ ). The data correlation coefficient is  $c_{\rho\omega} = -0.036$ .
- (d) An example of correlation between roll ( $\rho$ ) and twist ( $\omega$ ). The data correlation coefficient is  $c_{\rho\omega} = -0.036$ .
- (e) An example of correlation between roll ( $\rho$ ) and twist ( $\omega$ ). The data correlation coefficient is  $c_{\rho\omega} = -0.055$ .



**Fig. S5**

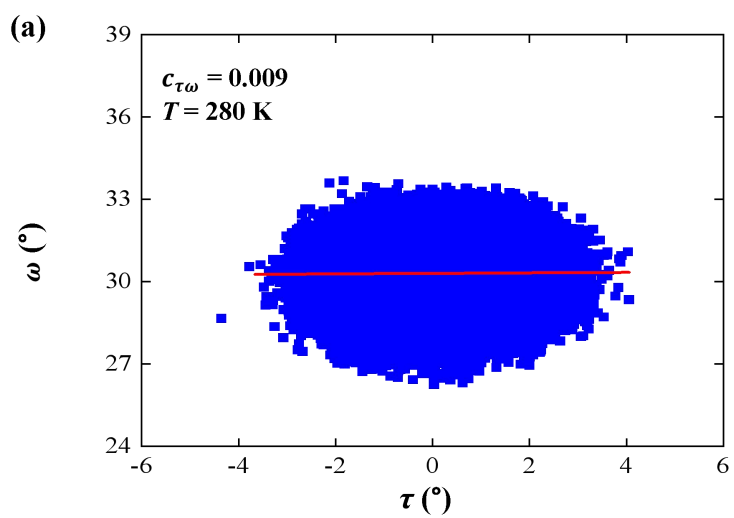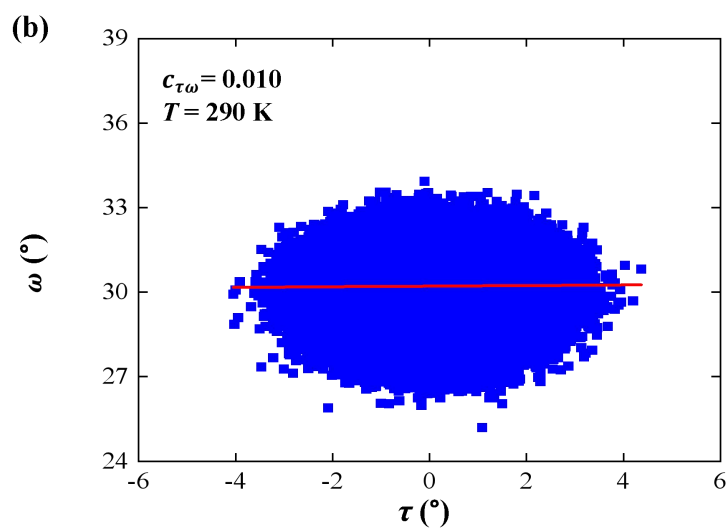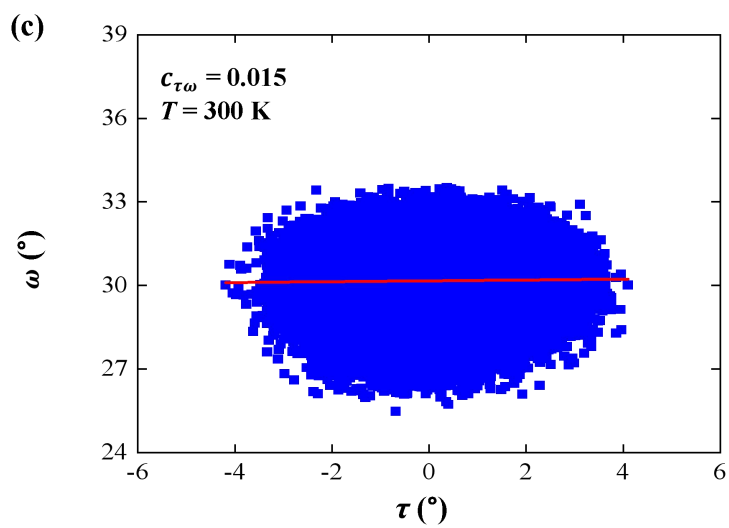

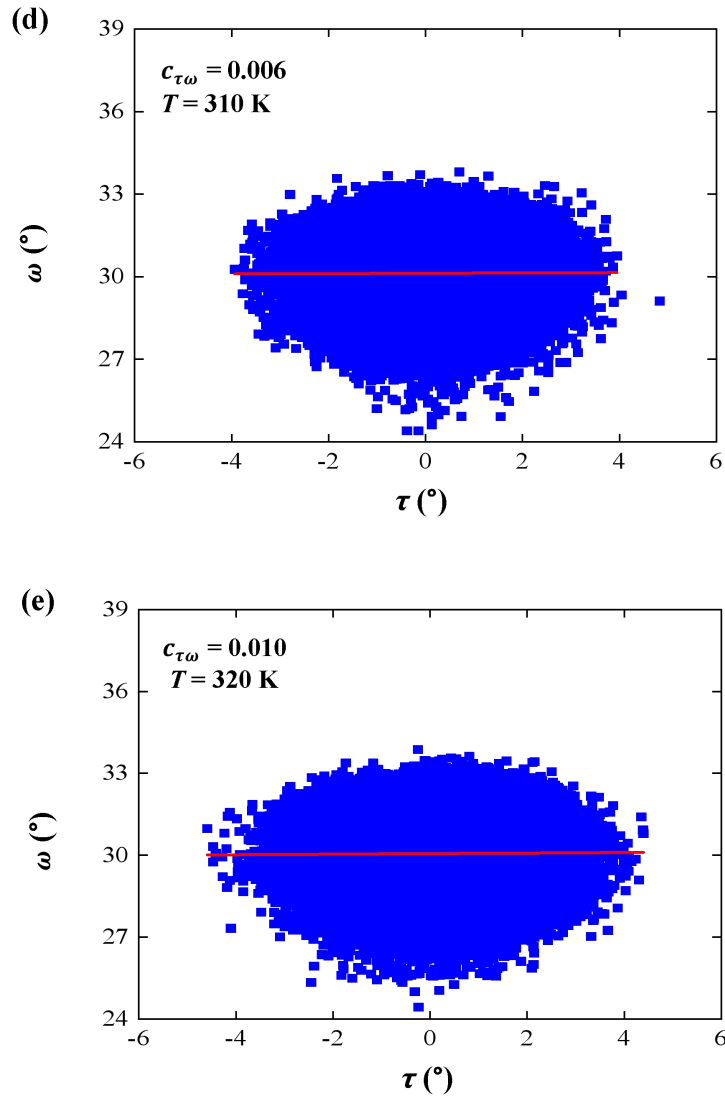

**Fig. S5**

- (a) An example of correlation between tilt ( $\tau$ ) and twist ( $\omega$ ). The data correlation coefficient is  $c_{\tau\omega} = 0.009$ .
- (b) An example of correlation between tilt ( $\tau$ ) and twist ( $\omega$ ). The data correlation coefficient is  $c_{\tau\omega} = 0.010$ .
- (c) An example of correlation between tilt ( $\tau$ ) and twist ( $\omega$ ). The data correlation coefficient is  $c_{\tau\omega} = 0.015$ .
- (d) An example of correlation between tilt ( $\tau$ ) and twist ( $\omega$ ). The data correlation coefficient is  $c_{\tau\omega} = 0.006$ .
- (e) An example of correlation between tilt ( $\tau$ ) and twist ( $\omega$ ). The data correlation coefficient is  $c_{\tau\omega} = 0.010$ .

**Fig. S6**

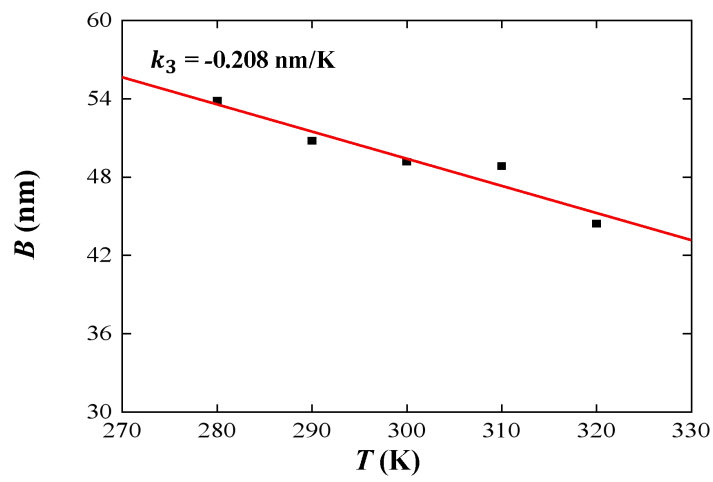

**Fig. S6** The function of bending anisotropy  $B$  as a function of temperature  $T$ , and the line is a fitting result with a slope of  $k_3 = -0.208$  nm/K.

## Table S1

**Table S1** The structural parameters and Pearson coefficient of dsRNA at different temperatures

| Structure Parameters         | 280 K            | 290 K            | 300 K            | 310 K            | 320 K            |
|------------------------------|------------------|------------------|------------------|------------------|------------------|
| Tilt, $\tau$ ( $^\circ$ )    | 0.10 $\pm$ 0.85  | 0.10 $\pm$ 0.87  | 0.08 $\pm$ 0.90  | 0.10 $\pm$ 0.90  | 0.11 $\pm$ 0.94  |
| Roll, $\rho$ ( $^\circ$ )    | 8.75 $\pm$ 1.92  | 8.86 $\pm$ 1.95  | 9.05 $\pm$ 2.09  | 9.30 $\pm$ 2.10  | 9.61 $\pm$ 2.22  |
| twist, $\omega$ ( $^\circ$ ) | 30.30 $\pm$ 0.83 | 30.22 $\pm$ 0.86 | 30.16 $\pm$ 0.88 | 30.13 $\pm$ 0.88 | 30.06 $\pm$ 0.93 |
| corr( $\tau,\rho$ )          | -0.0199          | 0.0061           | -0.0318          | -0.0004          | -0.0057          |
| corr( $\tau,\omega$ )        | 0.0178           | 0.0106           | 0.0065           | 0.0062           | 0.0104           |
| corr( $\rho,\omega$ )        | -0.0409          | -0.0567          | -0.0857          | -0.0860          | -0.1309          |
| $L_0$ (nm)                   | 2.9608           | 2.9575           | 2.9538           | 2.9359           | 2.9190           |

## Table S2

**Table S2** Summary of elasticity matrix **K** data for dsRNA at different temperatures.

| <b>K elements</b>          | 280 K  | 290 K  | 300 K  | 310 K  | 320 K  |
|----------------------------|--------|--------|--------|--------|--------|
| $K_{\tau\tau}$ (pN·nm)     | 175.04 | 172.36 | 169.39 | 174.68 | 164.45 |
| $K_{\rho\rho}$ (pN·nm)     | 34.43  | 34.86  | 31.50  | 32.27  | 30.00  |
| $K_{\omega\omega}$ (pN·nm) | 182.68 | 179.34 | 177.96 | 182.25 | 172.61 |
| $K_{\tau\rho}$ (pN·nm)     | 1.49   | -0.52  | 2.29   | -0.01  | 0.31   |
| $K_{\tau\omega}$ (pN·nm)   | -3.04  | -1.93  | -0.67  | -1.10  | -1.65  |
| $K_{\rho\omega}$ (pN·nm)   | 3.22   | 4.49   | 6.40   | 6.59   | 9.42   |

## Table S3

**Table S3** Summary of dsRNA elasticity parameters in the previous works.

| Subject  |             |                             |               | Elastic parameters |                            |                                     |                 |                                    |
|----------|-------------|-----------------------------|---------------|--------------------|----------------------------|-------------------------------------|-----------------|------------------------------------|
| Length   | Temperature | Ions                        | Concentration | $K_{ss}$           | $l_b$                      | $K_{TT}$                            | $K_{ST}$        | References                         |
| 4 kbp    | 298 K       | 150 mM NaCl                 |               | 500±29 pN          | 60 ± 1 nm                  |                                     |                 | Herrero-Galan et al. <sup>24</sup> |
| 4.2 kbp  | 298 K       | 10 mM Tris·HCl and 1mM EDTA |               | 350±100 pN         | 66.3 nm<br>57± 2 nm        | 410 ± 8 pN · nm <sup>2</sup>        | -0.85 ± 0.04 nm | Lipfert et al. <sup>25</sup>       |
| 12.5 kbp | 295 K       | 1mM NaCl                    |               | 630 pN             | 61 nm                      |                                     |                 | Zhang et al. <sup>26</sup>         |
| 16 bp    | 298.15 K    | 100 mM NaCl                 |               | 434±41.09 pN       | 69 ± 4 nm                  | 214.34 ± 32.48 pN · nm <sup>2</sup> |                 | Zhang et al. <sup>27</sup>         |
| 16 bp    | 300 K       | Na <sup>+</sup>             |               | 602.83±27.73 pN    | 66.99 ± 1.38 nm            | 416.78 ± 13.16 pN · nm <sup>2</sup> |                 | Chhetri et al. <sup>28</sup>       |
| 4.2 kbp  | 298 K       | 10 mM Tris·HCl and 1mM EDTA |               |                    | 63.8 ± 0.7 nm<br>62 ± 2 nm |                                     |                 | Abels et al. <sup>64</sup>         |
